# Supplementary material for: One-pot catalytic conversion of methanol to C6–C21 hydrocarbons over bi-functional MFe2O4 (M = Ni, Zn, Mn, Co) catalysts
Source: Royal Society of Chemistry journal article supplement (doi:10.1039/c4ra14509g), 2015-01-01
Supplement: c4ra14509g1.pdf [file c4ra14509g1.pdf]

## Supporting information

### **One-pot catalytic conversion of methanol to C6-C21 hydrocarbons over bi-functional MFe<sub>2</sub>O<sub>4</sub> (M = Ni, Zn, Mn, Co) catalysts**

Huilong Lai,<sup>a,b</sup> Zailei Zhang,<sup>b</sup> Fangna Gu,<sup>b,\*</sup> Zhengming Yi,<sup>a,\*</sup> Ziyi Zhong,<sup>c</sup> and Fabing Su<sup>b,\*</sup>

<sup>a</sup> *School of Chemical Engineering, Xiangtan University, Xiangtan 411105, Hunan, China*

<sup>b</sup> *State Key Laboratory of Multiphase Complex Systems, Institute of Process Engineering, Chinese Academy of Sciences, Beijing 100190, China*

<sup>c</sup> *Institute of Chemical Engineering and Sciences, A\*star, 1 Pesek Road, Jurong Island, Singapore 627833, Singapore*

\*Corresponding author: [fngu@ipe.ac.cn](mailto:fngu@ipe.ac.cn) (F. Gu); [YIZM@xtu.edu.cn](mailto:YIZM@xtu.edu.cn) (Z. Yi); [fbsu@ipe.ac.cn](mailto:fbsu@ipe.ac.cn) (F. Su),

Tel.: +86-10-82544850; Fax: +86-10-82544851

## S-1: synthesis conditions of catalysts

**Table S1** The synthesis conditions used for prepared catalysts.

| Sample                                                             | Ni(CH <sub>3</sub> COO) <sub>2</sub><br>(mmol) | Zn(CH <sub>3</sub> COO) <sub>2</sub><br>(mmol) | Mn(CH <sub>3</sub> COO) <sub>2</sub><br>(mmol) | Co(CH <sub>3</sub> COO) <sub>2</sub><br>(mmol) | FeCl <sub>3</sub><br>(mmol) | CH <sub>3</sub> COONa<br>(mmol) | HOCH <sub>2</sub> CH <sub>2</sub><br>OH(mL) | H <sub>2</sub> O<br>(mL) |
|--------------------------------------------------------------------|------------------------------------------------|------------------------------------------------|------------------------------------------------|------------------------------------------------|-----------------------------|---------------------------------|---------------------------------------------|--------------------------|
| NiO                                                                | 2.0                                            | –                                              | –                                              | –                                              | –                           | 18                              | 40                                          | 40                       |
| ZnO                                                                | –                                              | 2.0                                            | –                                              | –                                              | –                           | 18                              | 40                                          | 40                       |
| Mn <sub>3</sub> O <sub>4</sub>                                     | –                                              | –                                              | 2.0                                            | –                                              | –                           | 18                              | 40                                          | 40                       |
| Co <sub>3</sub> O <sub>4</sub>                                     | –                                              | –                                              | –                                              | 2.0                                            | –                           | 18                              | 40                                          | 40                       |
| Fe <sub>3</sub> O <sub>4</sub>                                     | –                                              | –                                              | –                                              | –                                              | 2.0                         | 18                              | 40                                          | 40                       |
| NiFe <sub>2</sub> O <sub>4</sub>                                   | 1.0                                            | –                                              | –                                              | –                                              | 2.0                         | 18                              | 40                                          | 40                       |
| ZnFe <sub>2</sub> O <sub>4</sub>                                   | –                                              | 1.0                                            | –                                              | –                                              | 2.0                         | 18                              | 40                                          | 40                       |
| MnFe <sub>2</sub> O <sub>4</sub>                                   | –                                              | –                                              | 1.0                                            | –                                              | 2.0                         | 18                              | 40                                          | 40                       |
| CoFe <sub>2</sub> O <sub>4</sub>                                   | –                                              | –                                              | –                                              | 1.0                                            | 2.0                         | 18                              | 40                                          | 40                       |
| Ni <sub>0.5</sub> Co <sub>0.5</sub> Fe <sub>2</sub> O <sub>4</sub> | 0.5                                            | –                                              | –                                              | 0.5                                            | 2.0                         | 18                              | 40                                          | 40                       |
| Zn <sub>0.5</sub> Co <sub>0.5</sub> Fe <sub>2</sub> O <sub>4</sub> | –                                              | 0.5                                            | –                                              | 0.5                                            | 2.0                         | 18                              | 40                                          | 40                       |
| Mn <sub>0.5</sub> Co <sub>0.5</sub> Fe <sub>2</sub> O <sub>4</sub> | –                                              | –                                              | 0.5                                            | 0.5                                            | 2.0                         | 18                              | 40                                          | 40                       |

**S-2: The XPS spectra of ZnFe<sub>2</sub>O<sub>4</sub> catalyst reduced at 340 °C with H<sub>2</sub>**

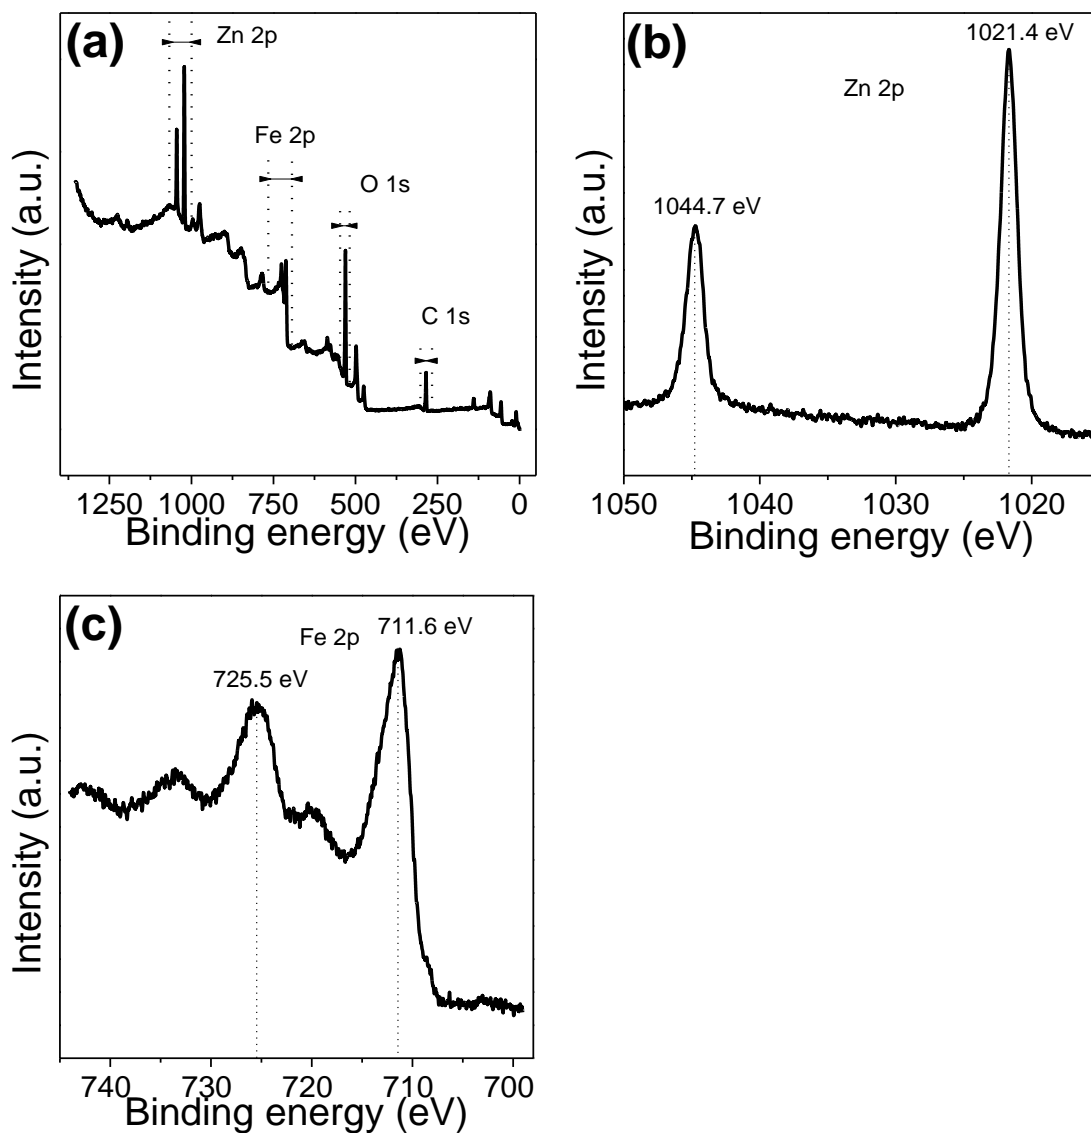

**Fig. S1** XPS spectra of the ZnFe<sub>2</sub>O<sub>4</sub> catalyst: (a) wide spectrum, (b) Zn2p and (c) Fe 2p spectrum.

### S-3: XRD of used catalyst

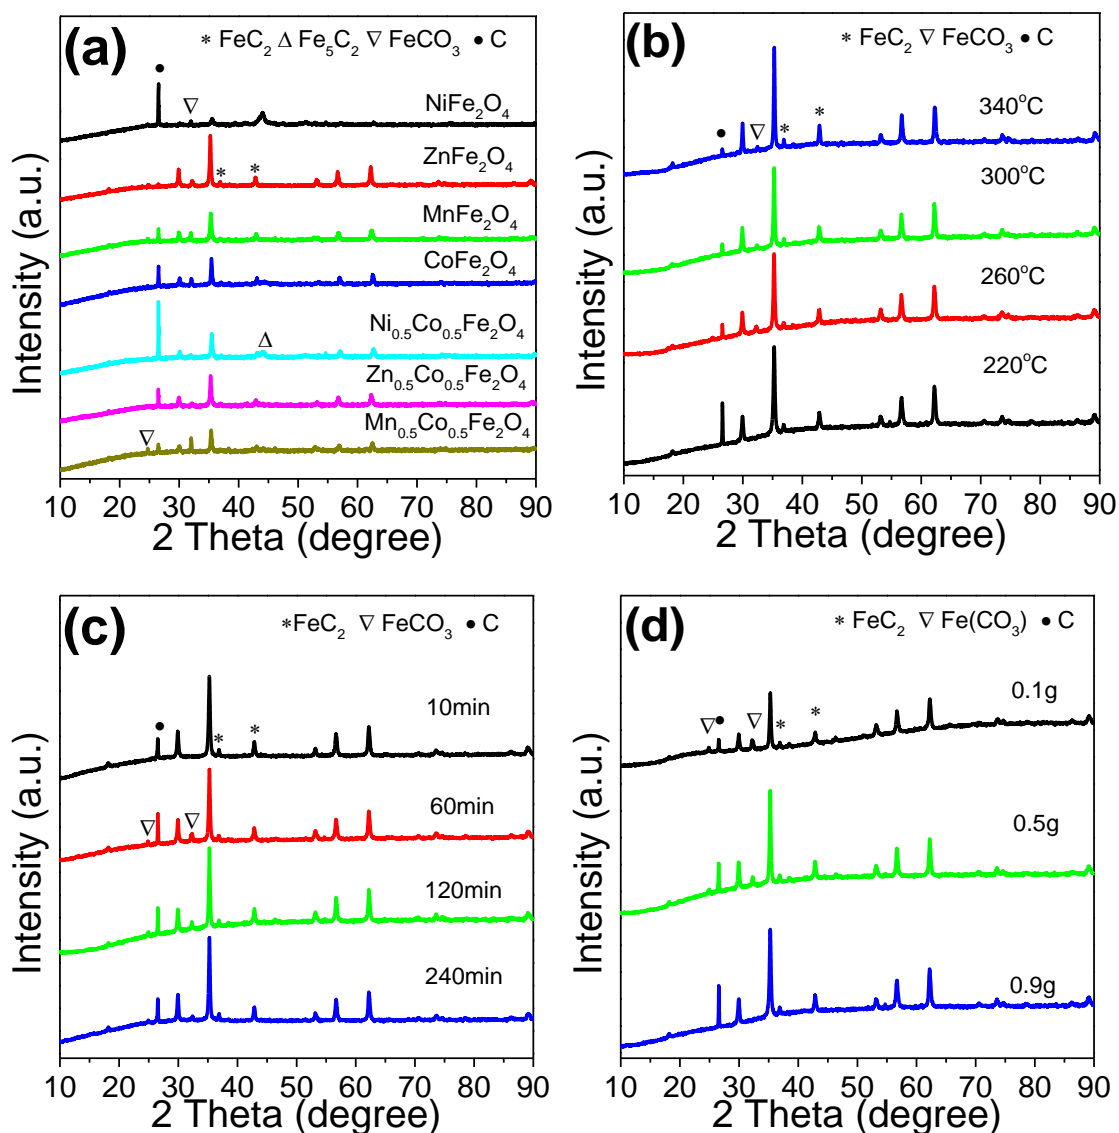

**Fig. S2** XRD patterns of the used catalysts: (a) MFe<sub>2</sub>O<sub>4</sub> and M<sub>0.5</sub>Co<sub>0.5</sub>Fe<sub>2</sub>O<sub>4</sub> after reaction at 280 °C for 3 h, (b) ZnFe<sub>2</sub>O<sub>4</sub> reacted at different temperature, (c) different reaction time, and (d) different catalyst amount.

#### S-4: SEM and elemental mapping characterization

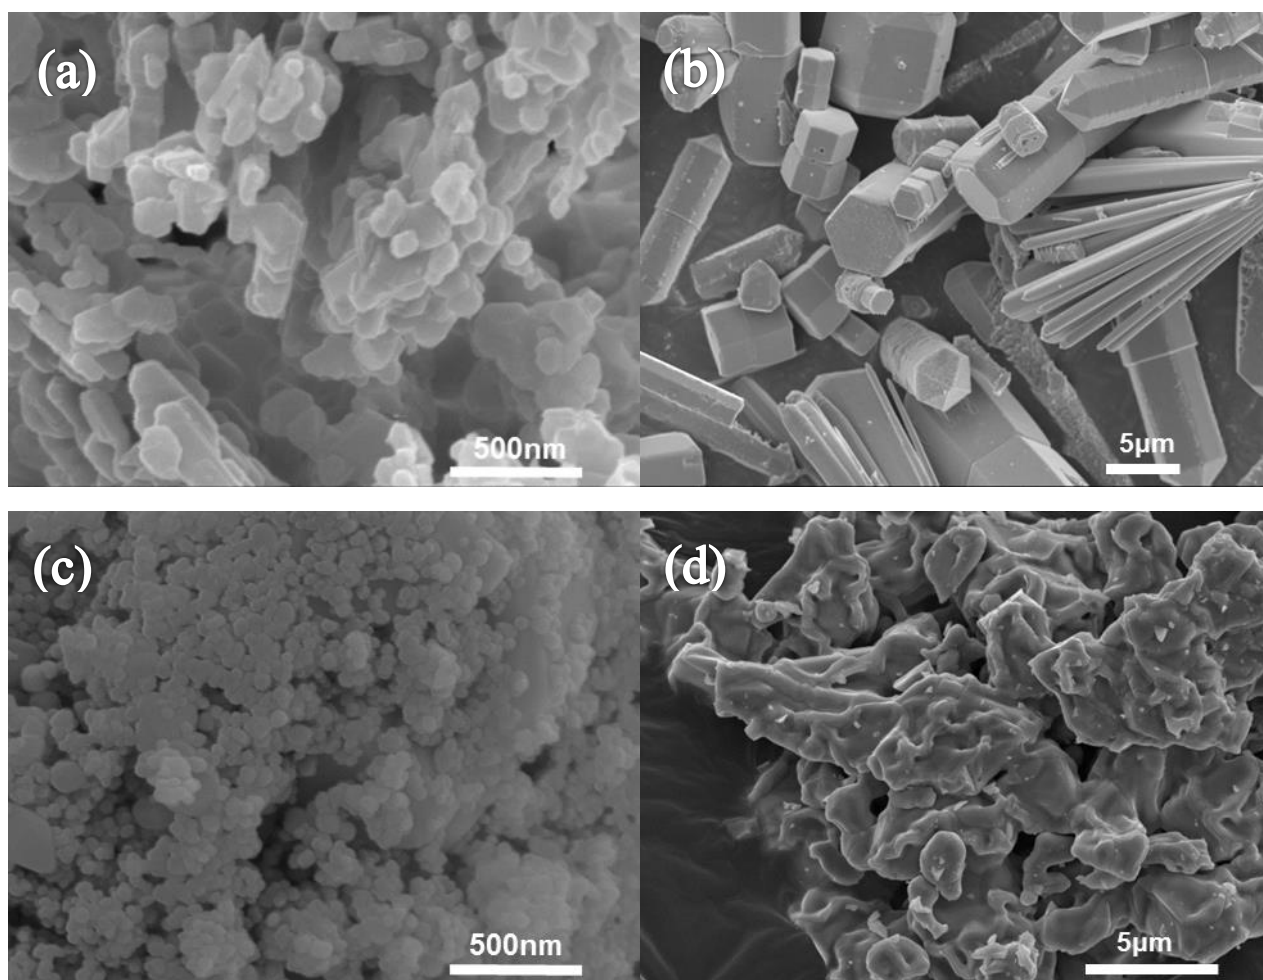

**Fig. S3** SEM images of the catalysts: (a) NiO, (b) ZnO, (c) Mn<sub>3</sub>O<sub>4</sub>, and (d) Co<sub>3</sub>O<sub>4</sub>.

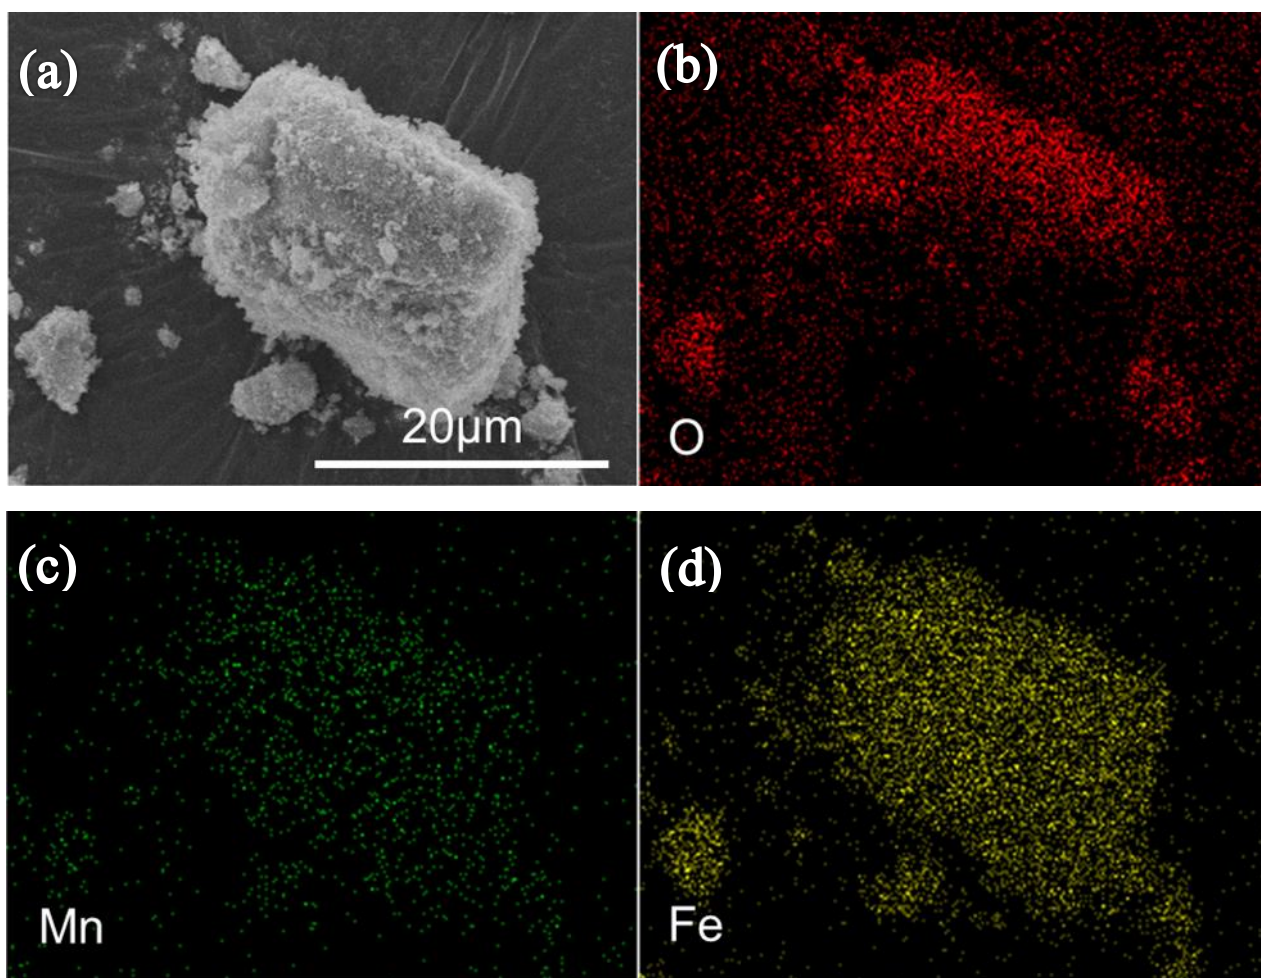

**Fig. S4** SEM image of MnFe<sub>2</sub>O<sub>4</sub> (a) and the corresponding elemental mapping images of O (b), Mn (c), and Fe (d).

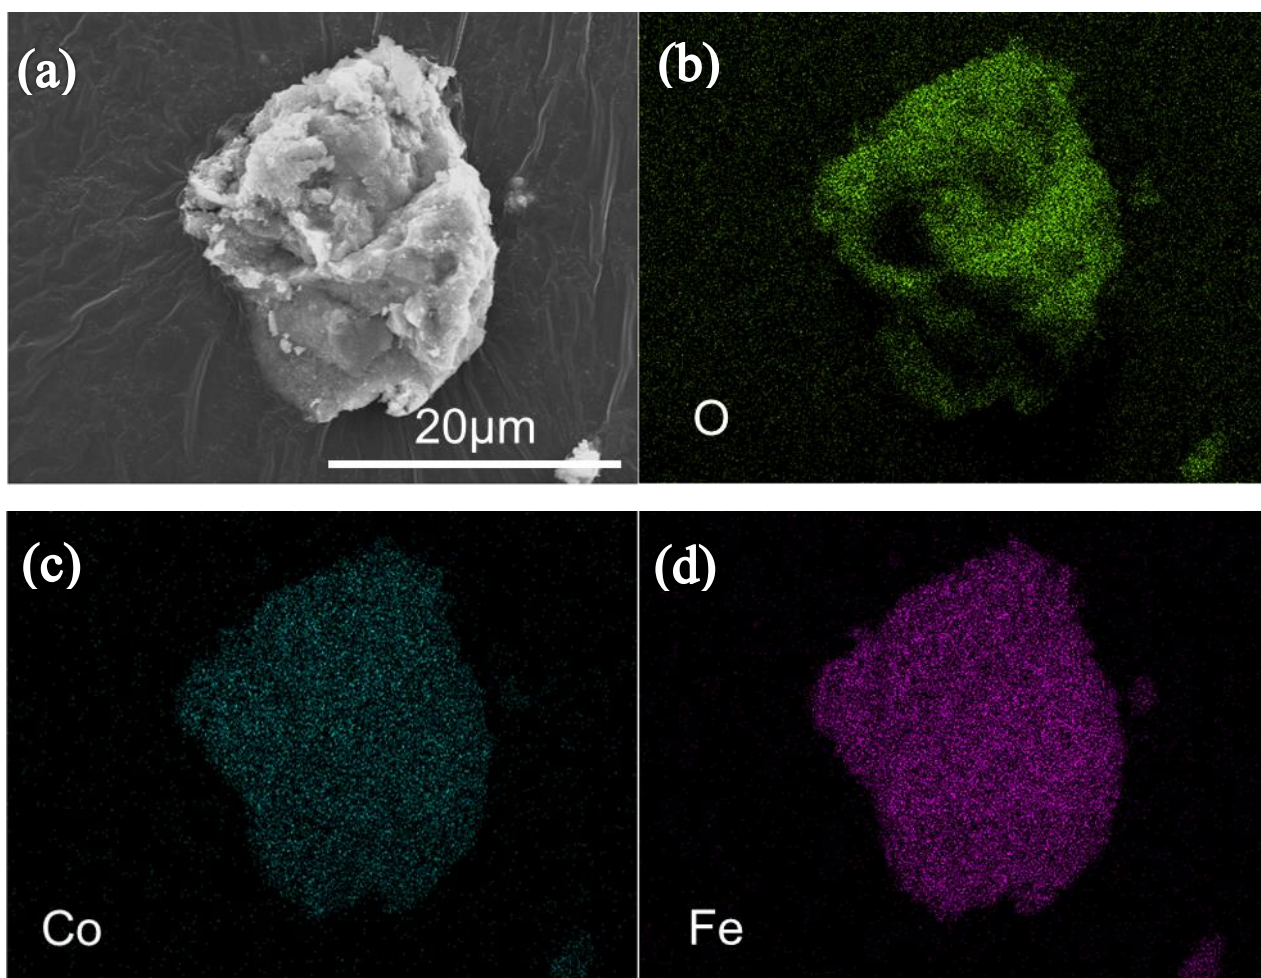

**Fig. S5** SEM image of CoFe<sub>2</sub>O<sub>4</sub> (a) and the corresponding elemental mapping images of O (b), Mn (c), and Fe (d).

## S-5: The composition of C6-C21 hydrocarbon products under different conditions

**Table S2** The composition of C6-C21 hydrocarbon in liquid products over  $\text{MFe}_2\text{O}_4$  catalysts. (peak area %)

| Entry | C6-C21 hydrocarbon        | Catalyst                  |                           |                           |                           |
|-------|---------------------------|---------------------------|---------------------------|---------------------------|---------------------------|
|       |                           | $\text{NiFe}_2\text{O}_4$ | $\text{ZnFe}_2\text{O}_4$ | $\text{MnFe}_2\text{O}_4$ | $\text{CoFe}_2\text{O}_4$ |
| 1     | 2,4-dimethyl-Pentane      | N/A                       | N/A                       | 3.55                      | N/A                       |
| 2     | 1,3-dimethyl-Cyclopentane | 0.87                      | N/A                       | N/A                       | N/A                       |
| 3     | ethyl-Cyclopentane        | N/A                       | N/A                       | N/A                       | 0.95                      |
| 4     | 2-methyl-Hexane           | 1.97                      | 1.95                      | N/A                       | 4.52                      |
| 5     | 3-methyl-Hexane           | 1.81                      | 2.30                      | N/A                       | 4.95                      |
| 6     | 3-Methyl-2-hexene         | N/A                       | 0.97                      | N/A                       | N/A                       |
| 7     | 2,4-dimethyl-Hexane       | 2.11                      | 3.14                      | N/A                       | N/A                       |
| 8     | 1-Heptene                 | N/A                       | N/A                       | 10.69                     | N/A                       |
| 9     | Heptane                   | 5.65                      | 14.76                     | 7.88                      | 21.21                     |
| 10    | 2-methyl-Heptane          | 1.24                      | 1.02                      | N/A                       | N/A                       |
| 11    | 3-methyl-Heptane          | N/A                       | N/A                       | N/A                       | 3.92                      |
| 12    | 4-methyl-Heptane          | N/A                       | N/A                       | N/A                       | N/A                       |
| 13    | 2-Heptene                 | N/A                       | 1.20                      | 3.73                      | N/A                       |
| 14    | 3-Heptene                 | N/A                       | N/A                       | N/A                       | N/A                       |
| 15    | p-Xylene                  | N/A                       | N/A                       | N/A                       | 1.01                      |
| 16    | Ethyl benzene             | N/A                       | N/A                       | N/A                       | 1.02                      |
| 17    | 1-Octene                  | N/A                       | N/A                       | 9.58                      | N/A                       |
| 18    | Octane                    | 4.95                      | 15.56                     | 6.62                      | 16.23                     |
| 19    | 2-Octene                  | N/A                       | N/A                       | 2.53                      | N/A                       |
| 20    | 2-methyl-Octane           | N/A                       | 2.62                      | N/A                       | 3.76                      |
| 21    | 3-methyl-Octane           | N/A                       | 1.48                      | N/A                       | 2.02                      |
| 22    | 4-methyl-Octane           | N/A                       | N/A                       | N/A                       | N/A                       |
| 23    | 1-methyl-Indan            | N/A                       | N/A                       | N/A                       | 0.54                      |
| 24    | 1-Nonene                  | N/A                       | N/A                       | 6.96                      | N/A                       |
| 25    | Nonane                    | 4.01                      | 13.16                     | 5.6                       | 10.23                     |
| 26    | cis-2-Nonene              | N/A                       | N/A                       | 4.47                      | N/A                       |
| 27    | Decane                    | 4.99                      | 10.09                     | N/A                       | 5.91                      |
| 28    | 2-methyl-Decane           | N/A                       | N/A                       | N/A                       | 0.65                      |
| 29    | 3-methyl-Decane           | N/A                       | N/A                       | N/A                       | N/A                       |
| 30    | 2-methyl-Nonane           | N/A                       | 0.95                      | N/A                       | 1.15                      |
| 31    | 3-methyl-Nonane           | N/A                       | 1.54                      | N/A                       | 1.57                      |
| 32    | 4-methyl-Nonane           | N/A                       | 1.04                      | N/A                       | 2.26                      |
| 33    | 5-(2-methylpropyl)-Nonane | N/A                       | 0.93                      | N/A                       | 0.87                      |
| 34    | 1-Decene                  | N/A                       | N/A                       | 3.96                      | N/A                       |
| 35    | Undecane                  | N/A                       | N/A                       | 4.21                      | 3.08                      |



|                          |                               |              |           |             |              |
|--------------------------|-------------------------------|--------------|-----------|-------------|--------------|
| 36                       | 1-ethyl-2-heptyl-Cyclopropane | N/A          | N/A       | 2.33        | N/A          |
| 37                       | 1-Decene                      | N/A          | N/A       | 1.61        | N/A          |
| 38                       | 1-Undecene                    | N/A          | N/A       | 2.28        | N/A          |
| 39                       | Undecane                      | N/A          | N/A       | 3.59        | N/A          |
| 40                       | 1-Undecene                    | N/A          | N/A       | 1.74        | N/A          |
| 41                       | 1-Undecene                    | N/A          | N/A       | 1.13        | N/A          |
| 42                       | 1-Dodecene                    | N/A          | N/A       | 1.41        | N/A          |
| 43                       | Dodecane                      | 6.37         | 12.18     | 3.53        | 1.76         |
| 44                       | nonyl-Cyclopropane            | N/A          | N/A       | 1.46        | N/A          |
| 45                       | 3-Tetradecene                 | N/A          | N/A       | 0.96        | N/A          |
| 46                       | Tridecane                     | 3.71         | 3.66      | 2.06        | 0.90         |
| 47                       | Tetradecane                   | 2.15         | 2.57      | 1.22        | N/A          |
| 48                       | Hexadecane                    | 3.80         | 2.88      | N/A         | N/A          |
| 49                       | (2,3-dimethyldecyl)-Benzene   | N/A          | N/A       | N/A         | 0.81         |
| <b>Total peak area %</b> |                               | <b>43.63</b> | <b>94</b> | <b>93.1</b> | <b>89.32</b> |

Note: Data in this table represent the percentage of peak area detected by GC/MS. "Total peak area %" represents the total peak area percentage of C6-C21 hydrocarbons among the detected products. "N/A" represents not available.

**Table S3** The composition of C6-C21 hydrocarbon in liquid products over  $M_{0.5}Co_{0.5}Fe_2O_4$  catalysts.

(peak area %)

| Entry | C6-C21 hydrocarbon              | Catalyst                  |                           |                           |
|-------|---------------------------------|---------------------------|---------------------------|---------------------------|
|       |                                 | $Ni_{0.5}Co_{0.5}Fe_2O_4$ | $Zn_{0.5}Co_{0.5}Fe_2O_4$ | $Mn_{0.5}Co_{0.5}Fe_2O_4$ |
| 1     | 2,4-dimethyl-Pentane            | N/A                       | N/A                       | 3.41                      |
| 2     | 2-methyl-Hexane                 | 2.43                      | N/A                       | N/A                       |
| 3     | 3-methyl-Hexane                 | 2.04                      | 2.49                      | 3.4                       |
| 4     | Heptane                         | 10.1                      | 14.61                     | 17.29                     |
| 5     | 2-Heptene                       | N/A                       | 1.95                      | N/A                       |
| 6     | 3-methyl-Heptane                | 2.06                      | 4.19                      | 3.17                      |
| 7     | Toluene                         | N/A                       | N/A                       | N/A                       |
| 8     | 2,4-dimethyl-Hexane             | N/A                       | 15.62                     | 14.42                     |
| 9     | Ethyl benzene                   | N/A                       | N/A                       | 1.23                      |
| 10    | 5-methyl-Undecane               | N/A                       | N/A                       | 3.16                      |
| 11    | Octane                          | 12.64                     | N/A                       | N/A                       |
| 12    | 2-Octene                        | N/A                       | 0.97                      | N/A                       |
| 13    | 2-methyl-Octane                 | 2.71                      | N/A                       | N/A                       |
| 14    | 3-methyl- Octane                | 1.79                      | 2.36                      | 2.15                      |
| 15    | 4-methyl- Octane                | N/A                       | 2.38                      | N/A                       |
| 16    | 2,4,6-trimethyl-Octane          | N/A                       | N/A                       | 5.95                      |
| 17    | o-Xylene                        | N/A                       | N/A                       | N/A                       |
| 18    | p-Xylene                        | 0.88                      | N/A                       | N/A                       |
| 19    | Nonane                          | 12.09                     | 11.56                     | 10.26                     |
| 20    | 4-methyl-Nonane                 | 1.55                      | N/A                       | 1.99                      |
| 21    | 2-methyl-Nonane                 | 1.12                      | N/A                       | 0.99                      |
| 22    | 3-methyl-Nonane                 | 1.42                      | 0.98                      | 1.28                      |
| 23    | 2,5-dimethyl-Nonane             | 0.57                      | N/A                       | N/A                       |
| 24    | 5-(2-methylpropyl)-Nonane       | 0.44                      | N/A                       | N/A                       |
| 25    | Decane                          | 8.76                      | 7.7                       | N/A                       |
| 26    | 2-methyl-Decane                 | 0.76                      | N/A                       | 1.17                      |
| 27    | 3-methyl-Decane                 | 0.68                      | N/A                       | 1.04                      |
| 28    | 4-methyl-Decane                 | 0.56                      | N/A                       | N/A                       |
| 29    | Indane                          | N/A                       | N/A                       | N/A                       |
| 30    | 1,3-dimethyl-Benzene            | 0.68                      | N/A                       | 0.96                      |
| 31    | (2,3-dimethyldecyl)- Benzene    | N/A                       | N/A                       | N/A                       |
| 32    | 2-methyl-Decane                 | N/A                       | N/A                       | N/A                       |
| 33    | (2-methyloctyl)-Benzene         | 3.63                      | N/A                       | N/A                       |
| 34    | 3-methyl-Decane                 | N/A                       | N/A                       | N/A                       |
| 35    | 1-methyl-2-(2-propenyl)-Benzene | N/A                       | N/A                       | N/A                       |
| 36    | 1-methyl-Indan                  | N/A                       | N/A                       | N/A                       |
| 37    | Undecane                        | 5.35                      | 5.06                      | 3.02                      |
| 38    | 4-ethyl-Octane                  | N/A                       | N/A                       | N/A                       |

|                          |             |             |             |              |
|--------------------------|-------------|-------------|-------------|--------------|
| <b>39</b>                | Dodecane    | 2.35        | 5.28        | N/A          |
| <b>40</b>                | Tridecane   | 1.67        | 1.95        | N/A          |
| <b>41</b>                | Tetradecane | 1.02        | N/A         | N/A          |
| <b>42</b>                | Hexadecane  | N/A         | 1.20        | N/A          |
| <b>Total peak area %</b> |             | <b>77.3</b> | <b>78.3</b> | <b>76.38</b> |

Note: Data in this table represent the percentage of peak area detected by GC/MS. “Total peak area %” represents the total peak area percentage of C6-C21 hydrocarbons among the detected products. “N/A” represents not available.

**Table S4** Effect of reaction temperature on the composition of C6-C21 hydrocarbon in liquid products over ZnFe<sub>2</sub>O<sub>4</sub> catalyst. (peak area %)

| Entry | C6-C21 hydrocarbon         | Reaction temperature |        |        |        |        |        |
|-------|----------------------------|----------------------|--------|--------|--------|--------|--------|
|       |                            | 240 °C               | 260 °C | 280 °C | 300 °C | 320 °C | 340 °C |
| 1     | 2-methyl-Hexane            | N/A                  | 2.44   | 1.95   | 2.84   | N/A    | N/A    |
| 2     | 3-methyl-Hexane            | N/A                  | 2.21   | 2.30   | 3.22   | 3.181  | 2.98   |
| 3     | 3-Methyl-2-hexene          | N/A                  | N/A    | 0.97   | 2.47   | 3.45   | 2.79   |
| 4     | 2,4,6-trimethyl-Heptane    | N/A                  | N/A    | N/A    | N/A    | N/A    | 3.61   |
| 5     | Octane                     | 2.20                 | N/A    | N/A    | N/A    | N/A    | N/A    |
| 6     | 1-Heptene                  | 14.45                | 3.95   | N/A    | N/A    | N/A    | N/A    |
| 7     | Heptane                    | 3.03                 | 13.79  | 14.76  | 18.16  | 17.25  | 14.85  |
| 8     | 2-Heptene                  | N/A                  | 5.00   | 1.20   | 3.57   | N/A    | 3.16   |
| 9     | 3-Heptene                  | N/A                  | 2.76   | N/A    | 1.71   | 6.43   | 1.50   |
| 10    | 2-methyl-Heptane           | N/A                  | N/A    | 3.02   | N/A    | N/A    | 1.73   |
| 11    | 3-methyl- Heptane          | N/A                  | N/A    | N/A    | N/A    | N/A    | 3.06   |
| 12    | 2,4-dimethyl-Hexane        | N/A                  | N/A    | 3.14   | 3.25   | N/A    | N/A    |
| 13    | 1-Octene                   | 10.41                | 1.71   | N/A    | N/A    | N/A    | N/A    |
| 14    | Octane                     | 2.97                 | 12.97  | 15.56  | 16.36  | 15.53  | 14.53  |
| 15    | 2-Octene                   | N/A                  | 3.39   | N/A    | 2.03   | N/A    | 1.81   |
| 16    | 3-Octene                   | N/A                  | 2.10   | N/A    | N/A    | 3.82   | N/A    |
| 17    | 2-methyl-Octane            | N/A                  | N/A    | 2.62   | N/A    | N/A    | N/A    |
| 18    | 4-methyl-Octane            | N/A                  | 1.97   | N/A    | 3.00   | 3.11   | 3.66   |
| 19    | 3-methyl-Octane            | N/A                  | 1.41   | 1.48   | 1.69   | 1.68   | 1.86   |
| 20    | 2,6,6-trimethyl-Octane     | N/A                  | N/A    | N/A    | N/A    | N/A    | 1.33   |
| 21    | 1-Nonene                   | 9.13                 | 1.39   | N/A    | N/A    | 0.83   | N/A    |
| 22    | 2-Nonene                   | N/A                  | 4.16   | N/A    | 1.42   | 1.76   | 1.58   |
| 23    | Nonane                     | 2.91                 | 10.61  | 13.16  | 12.04  | 11.41  | 11.84  |
| 24    | 2-methyl-Nonane            | N/A                  | N/A    | 0.95   | N/A    | N/A    | 1.27   |
| 25    | 3-methyl- Nonane           | N/A                  | N/A    | 1.54   | 1.22   | 1.19   | 1.47   |
| 26    | 4-methyl- Nonane           | N/A                  | N/A    | 1.04   | N/A    | N/A    | 1.59   |
| 27    | 5-(2-methylpropyl)- Nonane | N/A                  | N/A    | 0.93   | 0.95   | 0.92   | 1.18   |
| 28    | 1-Decene                   | 6.96                 | 1.82   | N/A    | N/A    | N/A    | N/A    |
| 29    | Decane                     | 2.76                 | 7.50   | 10.09  | 7.51   | 7.99   | 7.29   |
| 30    | trans-3-Decene             | N/A                  | N/A    | N/A    | 0.79   | 1.01   | N/A    |

|                          |                       |              |              |              |              |               |              |
|--------------------------|-----------------------|--------------|--------------|--------------|--------------|---------------|--------------|
| 31                       | 5-methyl-Decane       | N/A          | N/A          | N/A          | N/A          | 3.79          | N/A          |
| 32                       | 1-Undecene            | 5.18         | N/A          | N/A          | N/A          | N/A           | N/A          |
| 33                       | Undecane              | 2.55         | 5.67         | N/A          | 5.14         | 4.41          | 3.73         |
| 34                       | Dodecane              | 2.27         | 4.34         | 12.14        | 3.30         | 2.78          | 2.90         |
| 35                       | Tridecane             | 3.5          | 3.33         | 3.66         | N/A          | 1.68          | 0.66         |
| 36                       | 1-Tridecene           | 6.54         | N/A          | N/A          | N/A          | N/A           | N/A          |
| 37                       | 4,6-dimethyl-Dodecane | N/A          | N/A          | N/A          | 2.07         | N/A           | N/A          |
| 38                       | Tetradecane           | 3.66         | 2.70         | 3.66         | 1.37         | 1.09          | N/A          |
| 39                       | 1-Pentadecene         | 1.68         | N/A          | N/A          | N/A          | N/A           | N/A          |
| 40                       | Pentadecane           | 3.63         | 1.96         | N/A          | N/A          | N/A           | N/A          |
| 41                       | Hexadecane            | 2.96         | 1.30         | 2.88         | 0.82         | N/A           | N/A          |
| 42                       | Heptadecane           | 3.62         | N/A          | N/A          | N/A          | N/A           | N/A          |
| 43                       | 3-Octadecene          | 2.30         | N/A          | N/A          | N/A          | N/A           | N/A          |
| 44                       | Eicosane              | 1.41         | N/A          | N/A          | N/A          | N/A           | N/A          |
| 45                       | Heneicosane           | 4.90         | N/A          | N/A          | N/A          | N/A           | N/A          |
| <b>Total peak area %</b> |                       | <b>99.02</b> | <b>98.48</b> | <b>97.05</b> | <b>94.93</b> | <b>89.521</b> | <b>90.38</b> |

Note: Data in this table represent the percentage of peak area detected by GC/MS. "Total peak area %" represents the total peak area percentage of C6-C21 hydrocarbons among the detected products. "N/A" represents not available.

**Table S5** Effect of reaction time on the composition of C6-C21 hydrocarbon in liquid products over ZnFe<sub>2</sub>O<sub>4</sub> catalyst. (peak area %)

| Entry | C6-C21 hydrocarbon        | Reaction time |        |        |         |         |         |
|-------|---------------------------|---------------|--------|--------|---------|---------|---------|
|       |                           | 10 min        | 30 min | 60 min | 120 min | 180 min | 240 min |
| 1     | 2,4-dimethyl-Pentane      | N/A           | N/A    | 1.88   | N/A     | N/A     | N/A     |
| 2     | 1-Heptene                 | 10.47         | 6.33   | 4.00   | N/A     | N/A     | N/A     |
| 3     | Heptane                   | 4.91          | 11.34  | 13.66  | 13.39   | 18.16   | 16.60   |
| 4     | 2-Heptene                 | N/A           | N/A    | N/A    | N/A     | 3.57    | N/A     |
| 5     | 3-Heptene                 | N/A           | 5.58   | 7.05   | 6.75    | 1.71    | 5.62    |
| 6     | 2-methyl-Hexane           | N/A           | 1.62   | N/A    | 2.86    | 2.84    | 2.72    |
| 7     | 3-methyl-Hexane           | N/A           | 1.74   | 2.22   | 2.41    | 3.22    | 2.98    |
| 8     | 2,4-dimethyl-Hexane       | N/A           | N/A    | N/A    | 3.26    | 3.25    | 3.09    |
| 9     | 3-Methyl-2-hexene         | N/A           | N/A    | N/A    | N/A     | 2.47    | 2.65    |
| 10    | 1-Octene                  | 8.87          | 4.30   | 2.22   | N/A     | N/A     | N/A     |
| 11    | 2-Octene                  | N/A           | N/A    | N/A    | N/A     | 2.03    | N/A     |
| 12    | Octane                    | 5.14          | 11.18  | 13.32  | 13.25   | 16.36   | 15.48   |
| 13    | 3-methyl-Octane           | N/A           | N/A    | 1.42   | 1.43    | 1.69    | 1.60    |
| 14    | 4-methyl-Octane           | N/A           | N/A    | N/A    | 2.44    | 3.00    | 2.91    |
| 15    | 5-ethyl-2-methyl-Octane   | N/A           | N/A    | N/A    | 5.57    | N/A     | N/A     |
| 16    | 3-Octene                  | N/A           | 4.69   | 5.05   | 5.01    | N/A     | 3.48    |
| 17    | 1-Nonene                  | 7.27          | 4.72   | 3.02   | 7.87    | N/A     | N/A     |
| 18    | Nonane                    | 4.91          | 9.44   | 10.81  | 10.62   | 12.04   | 11.3    |
| 19    | 2-Nonene                  | N/A           | 2.55   | 2.59   | 2.45    | 1.42    | 1.57    |
| 20    | 3-methyl-Nonane           | N/A           | N/A    | N/A    | N/A     | 1.22    | N/A     |
| 21    | 5-(2-methylpropyl)-Nonane | N/A           | N/A    | N/A    | N/A     | 0.95    | N/A     |
| 22    | 1-Decene                  | 5.34          | 1.55   | N/A    | N/A     | N/A     | N/A     |
| 23    | Decane                    | 4.64          | 7.40   | 7.82   | 8.14    | 7.51    | 8.03    |
| 24    | 1-Decene                  | 1.02          | 2.02   | N/A    | 1.63    | N/A     | N/A     |
| 25    | trans-3-Decene            | N/A           | N/A    | N/A    | N/A     | 0.79    | 0.96    |
| 26    | 1-Undecene                | 4.34          | 1.47   | N/A    | N/A     | N/A     | N/A     |
| 27    | Undecane                  | 4.78          | 6.47   | 6.10   | N/A     | 5.14    | 4.76    |
| 28    | 3-Dodecene                | N/A           | N/A    | 1.86   | N/A     | N/A     | N/A     |
| 29    | 1-Dodecene                | 3.27          | N/A    | N/A    | N/A     | N/A     | N/A     |
| 30    | Dodecane                  | 4.59          | 5.10   | 4.53   | 4.97    | 3.30    | 3.12    |

|                          |                       |            |            |              |              |              |              |
|--------------------------|-----------------------|------------|------------|--------------|--------------|--------------|--------------|
| 31                       | Tridecane             | 4.09       | 3.77       | 3.30         | 2.21         | N/A          | 1.97         |
| 32                       | 1-Tridecene           | 2.34       | N/A        | N/A          | N/A          | N/A          | N/A          |
| 33                       | 4,6-dimethyl-Dodecane | N/A        | N/A        | N/A          | N/A          | 2.07         | N/A          |
| 34                       | 3-Tetradecene         | 1.03       | N/A        | N/A          | N/A          | N/A          | N/A          |
| 35                       | 7-methyl-Tridecane    | N/A        | N/A        | N/A          | N/A          | N/A          | 1.11         |
| 36                       | 3-Octadecene          | 1.75       | N/A        | N/A          | N/A          | N/A          | N/A          |
| 37                       | Tetradecane           | 3.91       | 3.33       | 2.62         | 1.82         | 1.37         | 1.31         |
| 38                       | 1-Pentadecene         | 1.25       | N/A        | N/A          | N/A          | N/A          | N/A          |
| 39                       | Hexadecane            | 7.46       | 4.16       | 3.77         | N/A          | 0.82         | N/A          |
| 40                       | Heptadecane           | 3.27       | 1.24       | 1.22         | N/A          | N/A          | N/A          |
| 41                       | Octadecane            | 2.20       | N/A        | N/A          | N/A          | N/A          | N/A          |
| 42                       | Nonadecane            | 1.81       | N/A        | N/A          | N/A          | N/A          | N/A          |
| 43                       | Heneicosane           | 1.34       | N/A        | N/A          | N/A          | N/A          | N/A          |
| <b>Total peak area %</b> |                       | <b>100</b> | <b>100</b> | <b>98.46</b> | <b>96.08</b> | <b>94.93</b> | <b>91.26</b> |

Note: Data in this table represent the percentage of peak area detected by GC/MS. "Total peak area %" represents the total peak area percentage of C6-C21 hydrocarbons among the detected products. "N/A" represents not available.

**Table S6** Effect of catalyst amount on the composition of C6-C21 hydrocarbon in liquid products over ZnFe<sub>2</sub>O<sub>4</sub> catalyst. (peak area %)

| Entry                    | C6-C21 hydrocarbon        | catalyst amount |              |              |              |
|--------------------------|---------------------------|-----------------|--------------|--------------|--------------|
|                          |                           | 0.1 g           | 0.3 g        | 0.5 g        | 0.9 g        |
| 1                        | 3-ethyl-1-Pentene         | N/A             | 1.38         | N/A          | N/A          |
| 2                        | 2-methyl-Hexane           | 2.57            | 3.19         | 2.86         | 1.87         |
| 3                        | 3-methyl-Hexane           | 3.36            | 3.44         | 2.41         | 2.46         |
| 4                        | 2,4-dimethyl-Hexane       | N/A             | N/A          | 3.26         | 3.20         |
| 5                        | Heptane                   | 17.32           | 19.13        | 13.39        | 14.48        |
| 6                        | 2-Heptene                 | 2.4             | N/A          | N/A          | 1.7          |
| 7                        | 3-Heptene                 | N/A             | 1.94         | 6.75         | N/A          |
| 8                        | 2-methyl-Heptane          | 2.21            | 2.32         | N/A          | N/A          |
| 9                        | 4-methyl-Heptane          | 1.13            | 1.12         | N/A          | N/A          |
| 10                       | 3-methyl-Heptane          | 3.13            | 2.96         | N/A          | N/A          |
| 11                       | Octane                    | 16.2            | 16.8         | 13.25        | 15.44        |
| 12                       | 2-Octene                  | 0.81            | N/A          | N/A          | 1.00         |
| 13                       | 3-Octene                  | N/A             | 0.92         | 5.01         | N/A          |
| 14                       | 4-methyl-Octane           | 3.23            | 3.15         | 2.44         | 3.18         |
| 15                       | 3-methyl-Octane           | 1.68            | 1.60         | 1.43         | 1.71         |
| 16                       | Nonane                    | 12.44           | 12.12        | 10.62        | 12.89        |
| 17                       | 5-ethyl-2-methyl-Octane   | N/A             | 5.59         | 5.57         | N/A          |
| 18                       | 1-Nonene                  | N/A             | 1.19         | 7.87         | N/A          |
| 19                       | cis-2-Nonene              | N/A             | N/A          | 2.45         | N/A          |
| 20                       | 4-methyl-Nonane           | 1.22            | 1.09         | N/A          | N/A          |
| 21                       | 2-methyl- Nonane          | 1.06            | 1.02         | N/A          | 1.02         |
| 22                       | 3-methyl-Nonane           | 1.72            | 1.54         | N/A          | 1.44         |
| 23                       | Decane                    | 8.66            | 8.16         | 8.14         | 9.5          |
| 24                       | 1-Decene                  | N/A             | N/A          | 1.63         | N/A          |
| 25                       | 4-methyl- Decane          | 0.80            | N/A          | N/A          | N/A          |
| 26                       | 2-methyl-Decane           | 0.78            | N/A          | N/A          | 0.97         |
| 27                       | 5-(2-methylpropyl)-Nonane | 1.03            | N/A          | N/A          | 1.18         |
| 28                       | Undecane                  | 6.15            | N/A          | N/A          | 7.16         |
| 29                       | Dodecane                  | 4.03            | 3.64         | 4.97         | 4.93         |
| 30                       | 4,6-dimethyl-Dodecane     | N/A             | N/A          | N/A          | 3.47         |
| 31                       | Tridecane                 | 2.89            | N/A          | 2.21         | N/A          |
| 32                       | Tetradecane               | 1.91            | 1.71         | 1.82         | 2.21         |
| 33                       | Hexadecane                | 1.20            | 3.57         | N/A          | 1.33         |
| <b>Total peak area %</b> |                           | <b>97.93</b>    | <b>97.58</b> | <b>96.08</b> | <b>91.14</b> |

Note: Data in this table represent the percentage of peak area detected by GC/MS. “Total peak area %” represents the total peak area percentage of C6-C21 hydrocarbons among the detected products. “N/A” represents not available



**Table S7** The composition of C6-C21 hydrocarbon in liquid products over ZnFe<sub>2</sub>O<sub>4</sub> catalyst for 4 runs reactions. (peak area %)

| Entry                    | C6-C21 hydrocarbon        | Four circles |              |              |            |
|--------------------------|---------------------------|--------------|--------------|--------------|------------|
|                          |                           | Run1         | Run2         | Run3         | Run4       |
| 1                        | 2,3,4-trimethyl-Pentane   | N/A          | 1.33         | 1.38         | N/A        |
| 2                        | 2-methyl-Hexane           | 2.86         | 3.14         | 4.12         | 4.28       |
| 3                        | 3-methyl- Hexane          | 2.41         | 3.68         | 4.69         | 4.65       |
| 4                        | 1-Nonene                  | 5.11         | N/A          | N/A          | N/A        |
| 5                        | Heptane                   | 13.39        | 17.69        | 19.24        | 19.15      |
| 6                        | 2-Heptene                 | N/A          | 1.84         | 1.21         | 1.30       |
| 7                        | 3-Heptene                 | 4.25         | N/A          | N/A          | N/A        |
| 8                        | 3-Heptene                 | 2.50         | N/A          | N/A          | N/A        |
| 9                        | 2-methyl-Heptane          | N/A          | 3.42         | 3.47         | 3.94       |
| 10                       | 3-methyl-Heptane          | N/A          | 4.15         | 4.08         | 4.28       |
| 11                       | 4-methyl-Heptane          | N/A          | N/A          | N/A          | 1.34       |
| 12                       | 2,5,5-trimethyl-Heptane   | N/A          | 0.81         | 0.80         | 0.78       |
| 13                       | 3-Methyl-2-hexene         | N/A          | N/A          | N/A          | 2.48       |
| 14                       | 2,4-dimethyl-Hexane       | 3.26         | N/A          | N/A          | N/A        |
| 15                       | p-Xylene                  | N/A          | N/A          | N/A          | 0.63       |
| 16                       | Octane                    | 13.25        | 17.21        | 16.56        | 16.82      |
| 17                       | 3-Octene                  | 5.01         | N/A          | N/A          | N/A        |
| 18                       | 2-methyl-Octane           | N/A          | 4.13         | 4.12         | 4.31       |
| 19                       | 4-methyl-Octane           | 2.44         | N/A          | N/A          | N/A        |
| 20                       | 3-methyl- Octane          | 1.43         | 2.26         | 2.19         | 2.32       |
| 21                       | 1-Nonene                  | 1.44         | N/A          | N/A          | N/A        |
| 22                       | Nonane                    | 10.62        | 12.58        | 11.65        | 11.65      |
| 23                       | 3-methyl-Nonane           | N/A          | 2.00         | 1.93         | 2.01       |
| 24                       | 4-methyl-Nonane           | N/A          | 1.57         | 1.53         | 1.52       |
| 25                       | 5-methyl-Nonane           | N/A          | 0.74         | 0.71         | 0.78       |
| 26                       | cis-2-Nonene              | 2.45         | N/A          | N/A          | N/A        |
| 27                       | 1-Nonene                  | 1.32         | N/A          | N/A          | N/A        |
| 28                       | 2,5-dimethyl-Nonane       | N/A          | 0.80         | 0.83         | 0.82       |
| 29                       | 5-(2-methylpropyl)-Nonane | N/A          | 1.09         | 1.09         | 1.09       |
| 30                       | Decane                    | 8.14         | 7.74         | 7.24         | 6.88       |
| 31                       | 1-Decene                  | 1.63         | N/A          | N/A          | N/A        |
| 32                       | 2-methyl-Decane           | N/A          | 0.84         | 0.87         | 0.84       |
| 33                       | 3,6-dimethyl-Decane       | N/A          | N/A          | 0.64         | N/A        |
| 34                       | 5-ethyl-2-methyl-Octane   | 5.57         | N/A          | N/A          | N/A        |
| 35                       | Undecane                  | N/A          | 4.47         | 4.36         | 3.84       |
| 36                       | Dodecane                  | 4.97         | 2.36         | 2.4          | 3.36       |
| 37                       | Tridecane                 | 2.21         | 2.54         | 2.61         | 0.93       |
| 38                       | Tetradecane               | 1.82         | N/A          | N/A          | N/A        |
| <b>Total peak area %</b> |                           | <b>96.08</b> | <b>96.39</b> | <b>97.72</b> | <b>100</b> |

Note: Data in this table represent the percentage of peak area detected by GC/MS. "Total peak area %" represents the total peak area percentage of C6-C21 hydrocarbons among the detected products. "N/A" represents not available.

## S-6: The synthesis and characterization of supported ZnFe<sub>2</sub>O<sub>4</sub>

We also choose different supports to load the ZnFe<sub>2</sub>O<sub>4</sub> to test catalytic activity of selective conversion of methanol to C6-C21 hydrocarbons. In this paper,  $\alpha$ -Al<sub>2</sub>O<sub>3</sub>,  $\gamma$ -Al<sub>2</sub>O<sub>3</sub>, CB (carbon black), GCB (graphitized carbon black) and CNT (carbon nano tube) were used as supports.

### Catalysts Synthesis

In a typical synthesis, Zn(CH<sub>3</sub>COO)<sub>2</sub>•4H<sub>2</sub>O (3.0 mmol), FeCl<sub>3</sub>•6H<sub>2</sub>O (6.0 mmol), and CH<sub>3</sub>COONa•3H<sub>2</sub>O (54 mmol), and CB (0.4 g) were dissolved/dispersed in a mixture solution containing HOCH<sub>2</sub>CH<sub>2</sub>OH (120.0 mL) and deionized water (120.0 mL) to form a homogeneous slurry, which was subsequently sealed in a stainless steel autoclave and heated at 200 °C for 48 h to obtain the desired product. The resulting precipitate was collected by centrifugation; washed with distilled water and absolute ethanol; and finally, dried in vacuum at 80 °C for 24 h to obtain the ZnFe<sub>2</sub>O<sub>4</sub>/CB composite. Other catalysts were synthesized the same as the ZnFe<sub>2</sub>O<sub>4</sub>/CB, except use  $\alpha$ -Al<sub>2</sub>O<sub>3</sub>,  $\gamma$ -Al<sub>2</sub>O<sub>3</sub>, GCB, CNT to replace CB.

### Catalytic activity of supported catalyst

Fig. S6 show XRD patterns of supported ZnFe<sub>2</sub>O<sub>4</sub> catalysts. the observed diffraction peaks from the XRD patterns at  $2\theta$  values of 30.1, 35.6, 43.4, 57.3, and 62.8° correspond to the lattice planes of (220), (311), (400), (511), and (440) respectively, indicating the formation of ZnFe<sub>2</sub>O<sub>4</sub> (JCPDS 01-089-1012), While the others peaks correspond to lattice planes of supports, respectively. The crystal size of corresponding bare ZnFe<sub>2</sub>O<sub>4</sub> and supported ZnFe<sub>2</sub>O<sub>4</sub> catalysts was calculated by Scherrer equation and summarized in Table S8. When ZnFe<sub>2</sub>O<sub>4</sub> supported on  $\alpha$ -Al<sub>2</sub>O<sub>3</sub>,  $\gamma$ -Al<sub>2</sub>O<sub>3</sub>, CB, GCB and CNT, size of ZnFe<sub>2</sub>O<sub>4</sub> nanoparticles become smaller. As we can see from Figure S7a, the component of gas product of supported catalysts was almost the same with bare ZnFe<sub>2</sub>O<sub>4</sub> catalyst,

except that  $\text{ZnFe}_2\text{O}_4/\gamma\text{-Al}_2\text{O}_3$  had more  $\text{H}_2$  and less  $\text{CH}_4$ . Fig. S7b presents the liquid products of methanol conversion over  $\text{ZnFe}_2\text{O}_4$  supported catalysts. After  $\text{ZnFe}_2\text{O}_4$  loaded on different supports, reaction activity of conversion methanol to hydrocarbons decreased. This may be that the addition of supports covers the active sites of  $\text{ZnFe}_2\text{O}_4$ .

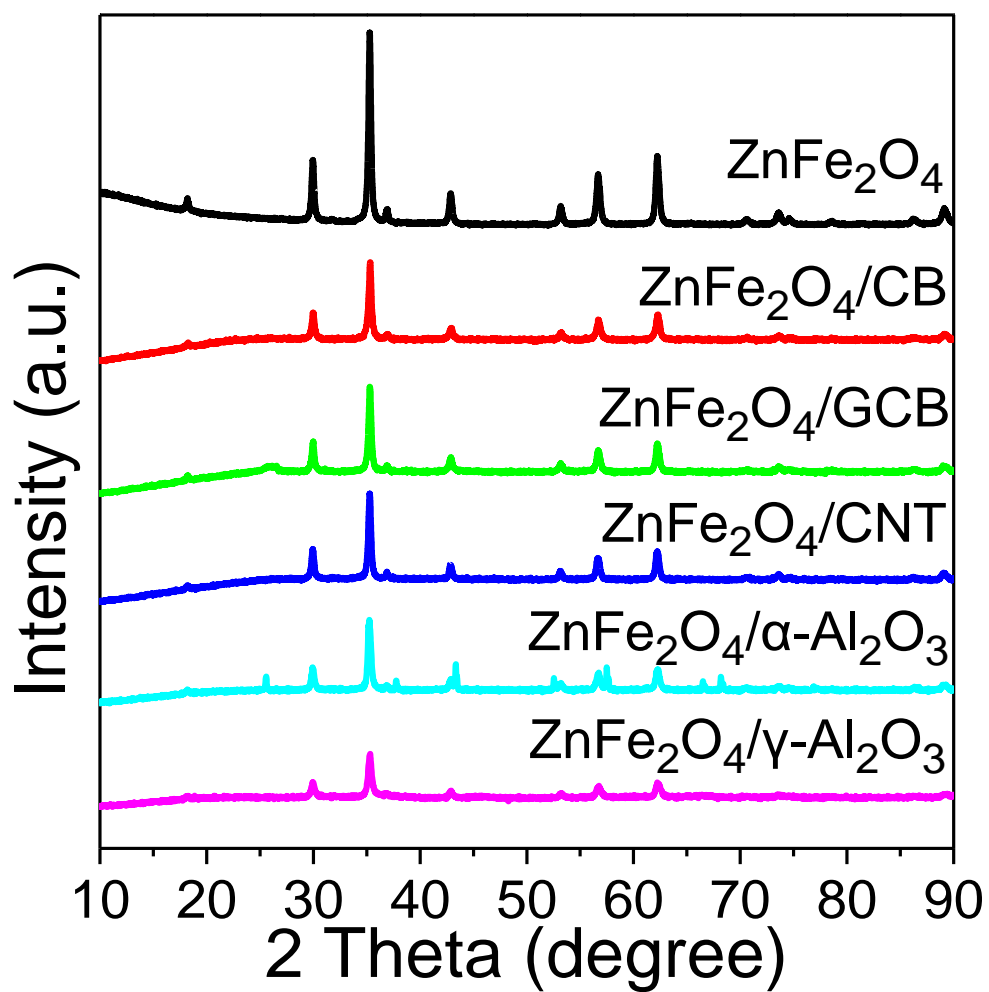

**Fig. S6** XRD patterns of supported ZnFe<sub>2</sub>O<sub>4</sub> catalysts.

**Table S8** Crystal size of bare and supported ZnFe<sub>2</sub>O<sub>4</sub> catalysts.

| Sample                                                             | Crystal size <sup>a</sup> |
|--------------------------------------------------------------------|---------------------------|
| ZnFe <sub>2</sub> O <sub>4</sub>                                   | 29.4                      |
| ZnFe <sub>2</sub> O <sub>4</sub> /α-Al <sub>2</sub> O <sub>3</sub> | 22.8                      |
| ZnFe <sub>2</sub> O <sub>4</sub> /γ-Al <sub>2</sub> O <sub>3</sub> | 22.6                      |
| ZnFe <sub>2</sub> O <sub>4</sub> /CB                               | 26.6                      |
| ZnFe <sub>2</sub> O <sub>4</sub> /GCB                              | 27.0                      |
| ZnFe <sub>2</sub> O <sub>4</sub> /CNT                              | 27.9                      |

<sup>a</sup> Crystal size, derived from XRD by Debye–Scherrer equation.

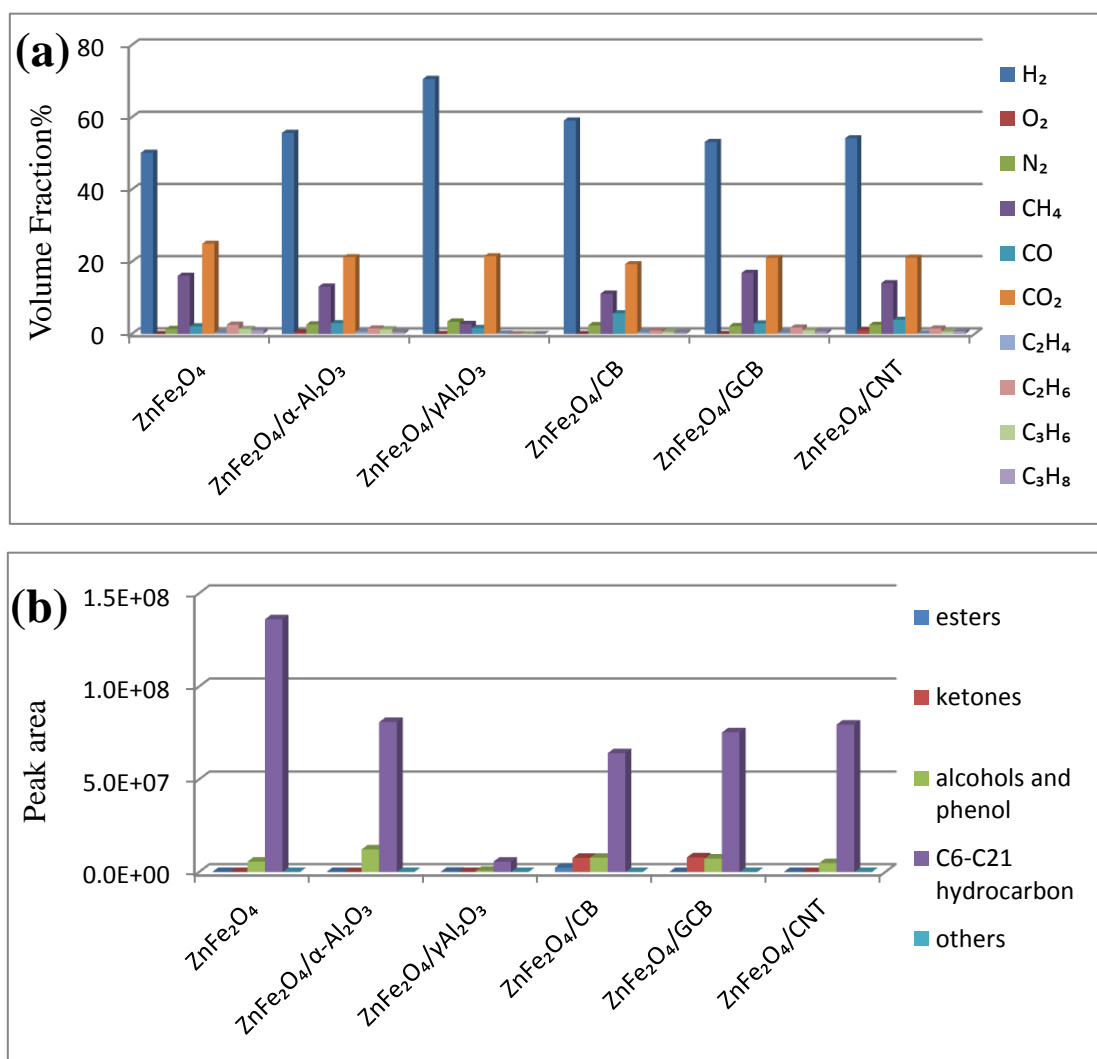

**Fig. S7** Distributions of gas (a) and liquid (b) products over supported catalysts. (Reaction conditions: 0.5 g catalyst, 30 mL methanol, 120 min, 300 °C.)
